# Supplementary material
Source: PubMed Central journal article supplement (PMC6990957)
Supplement: jamaophthalmol-138-260-s001.pdf [file jamaophthalmol-138-260-s001.pdf]

## Supplementary Online Content

Mazloumi M, Vichitvejpaisal P, Dalvin LA, et al. Accuracy of The Cancer Genome Atlas classification vs American Joint Committee on Cancer classification for prediction of metastasis in patients with uveal melanoma. *JAMA Ophthalmol*. Published online January 16, 2020. doi:10.1001/jamaophthalmol.2019.5710

**eFigure 1.** American Joint Committee on Cancer (AJCC) T category

**eFigure 2.** American Joint Committee on Cancer (AJCC) T subcategory

**eFigure 3.** American Joint Committee on Cancer (AJCC) stage

This supplementary material has been provided by the authors to give readers additional information about their work.

**eFigure 1.** American Joint Committee on Cancer (AJCC) T category

|                                                                                                                                                                                                                                                                                                                                  |                             |         |         |          |           |           |        |
|----------------------------------------------------------------------------------------------------------------------------------------------------------------------------------------------------------------------------------------------------------------------------------------------------------------------------------|-----------------------------|---------|---------|----------|-----------|-----------|--------|
| Thickness (mm)                                                                                                                                                                                                                                                                                                                   |                             |         |         |          |           |           |        |
| > 15.0                                                                                                                                                                                                                                                                                                                           | 4                           | 4       | 4       | 4        | 4         | 4         | 4      |
| 12.1 to 15.0                                                                                                                                                                                                                                                                                                                     | 3                           | 3       | 3       | 3        | 3         | 4         | 4      |
| 9.1 to 12.0                                                                                                                                                                                                                                                                                                                      | 3                           | 3       | 3       | 3        | 3         | 3         | 4      |
| 6.1 to 9.0                                                                                                                                                                                                                                                                                                                       | 2                           | 2       | 2       | 2        | 3         | 3         | 4      |
| 3.1 to 6.0                                                                                                                                                                                                                                                                                                                       | 1                           | 1       | 1       | 2        | 2         | 3         | 4      |
| ≤ 3.0                                                                                                                                                                                                                                                                                                                            | 1                           | 1       | 1       | 1        | 2         | 2         | 4      |
|                                                                                                                                                                                                                                                                                                                                  | ≤ 3.0                       | 3.1-6.0 | 6.1-9.0 | 9.1-12.0 | 12.1-15.0 | 15.1-18.0 | > 18.0 |
|                                                                                                                                                                                                                                                                                                                                  | Largest basal diameter (mm) |         |         |          |           |           |        |
| Adapted from the <i>AJCC Cancer Staging Manual, 8<sup>th</sup> edition</i><br>Amin MB, Edge S, Greene F, Byrd DR, Brookland RK, Washington MK, Gershenwald JE, Compton CC, Hess KR, et al. (Eds.). <i>AJCC Cancer Staging Manual</i> (8th edition). Springer International Publishing: American Joint Commission on Cancer; 2017 |                             |         |         |          |           |           |        |

**eFigure 2.** American Joint Committee on Cancer (AJCC) T subcategory

| T Category                                                                                                                                                                                                                                                                                              | T Criteria                                                                                                                                                                                             |
|---------------------------------------------------------------------------------------------------------------------------------------------------------------------------------------------------------------------------------------------------------------------------------------------------------|--------------------------------------------------------------------------------------------------------------------------------------------------------------------------------------------------------|
| Tx                                                                                                                                                                                                                                                                                                      | Primary tumor cannot be assessed                                                                                                                                                                       |
| T0                                                                                                                                                                                                                                                                                                      | No evidence of primary tumor                                                                                                                                                                           |
| T1                                                                                                                                                                                                                                                                                                      | Tumor base $\leq 9$ mm with thickness $\leq 6$ mm<br>Tumor base 9.1-12 mm with thickness $\leq 3$ mm                                                                                                   |
| T1a                                                                                                                                                                                                                                                                                                     | Tumor size category 1 without ciliary body involvement and extraocular extension                                                                                                                       |
| T1b                                                                                                                                                                                                                                                                                                     | Tumor size category 1 with ciliary body involvement                                                                                                                                                    |
| T1c                                                                                                                                                                                                                                                                                                     | Tumor size category 1 without ciliary body involvement but with extraocular extension $\leq 5$ mm in largest diameter                                                                                  |
| T1d                                                                                                                                                                                                                                                                                                     | Tumor size category 1 with ciliary body involvement and extraocular extension $\leq 5$ mm in largest diameter                                                                                          |
| T2                                                                                                                                                                                                                                                                                                      | Tumor base $\leq 9$ mm with thickness 6.1-9 mm<br>Tumor base 9.1-12 mm with thickness 3.1-9 mm<br>Tumor base 12.1-15 mm with thickness $\leq 6$ mm<br>Tumor base 15.1-18 mm with thickness $\leq 3$ mm |
| T2a                                                                                                                                                                                                                                                                                                     | Tumor size category 2 without ciliary body involvement and extraocular extension                                                                                                                       |
| T2b                                                                                                                                                                                                                                                                                                     | Tumor size category 2 with ciliary body involvement                                                                                                                                                    |
| T2c                                                                                                                                                                                                                                                                                                     | Tumor size category 2 without ciliary body involvement but with extraocular extension $\leq 5$ mm in largest diameter                                                                                  |
| T2d                                                                                                                                                                                                                                                                                                     | Tumor size category 2 with ciliary body involvement and extraocular extension $\leq 5$ mm in largest diameter                                                                                          |
| T3                                                                                                                                                                                                                                                                                                      | Tumor base 3.1-9 mm with thickness 9.1-12 mm<br>Tumor base 9.1-12 mm with thickness 9.1-15 mm<br>Tumor base 12.1-15 mm with thickness 6.1-15 mm<br>Tumor base 15.1-18 mm with thickness 3.1-12 mm      |
| T3a                                                                                                                                                                                                                                                                                                     | Tumor size category 3 without ciliary body involvement and extraocular extension                                                                                                                       |
| T3b                                                                                                                                                                                                                                                                                                     | Tumor size category 3 with ciliary body involvement                                                                                                                                                    |
| T3c                                                                                                                                                                                                                                                                                                     | Tumor size category 3 without ciliary body involvement but with extraocular extension $\leq 5$ mm in largest diameter                                                                                  |
| T3d                                                                                                                                                                                                                                                                                                     | Tumor size category 3 with ciliary body involvement and extraocular extension $\leq 5$ mm in largest diameter                                                                                          |
| T4                                                                                                                                                                                                                                                                                                      | Tumor base 12.1-15 mm with thickness $> 15$ mm<br>Tumor base 15.1-18 mm with thickness $> 12$ mm<br>Tumor base $> 18$ mm with any thickness                                                            |
| T4a                                                                                                                                                                                                                                                                                                     | Tumor size category 4 without ciliary body involvement and extraocular extension                                                                                                                       |
| T4b                                                                                                                                                                                                                                                                                                     | Tumor size category 4 with ciliary body involvement                                                                                                                                                    |
| T4c                                                                                                                                                                                                                                                                                                     | Tumor size category 4 without ciliary body involvement but with extraocular extension $\leq 5$ mm in largest diameter                                                                                  |
| T4d                                                                                                                                                                                                                                                                                                     | Tumor size category 4 with ciliary body involvement and extraocular extension $\leq 5$ mm in largest diameter                                                                                          |
| T4e                                                                                                                                                                                                                                                                                                     | Any tumor size category with extraocular extension $> 5$ mm in largest diameter                                                                                                                        |
| Adapted from the AJCC Cancer Staging Manual, 8th edition<br>Amin MB, Edge S, Greene F, Byrd DR, Brookland RK, Washington MK, Gershenwald JE, Compton CC, Hess KR, et al. (Eds.). AJCC Cancer Staging Manual (8th edition). Springer International Publishing: American Joint Commission on Cancer; 2017 |                                                                                                                                                                                                        |

**eFigure 3.** American Joint Committee on Cancer (AJCC) stage

| When T is ... | And *M is ... | Then the stage group is ... |
|---------------|---------------|-----------------------------|
| T1a           | M0            | I                           |
| T1b-d         | M0            | IIA                         |
| T2a           | M0            | IIA                         |
| T2b           | M0            | IIB                         |
| T3a           | M0            | IIB                         |
| T2c-d         | M0            | IIIA                        |
| T3b-c         | M0            | IIIA                        |
| T4a           | M0            | IIIA                        |
| T3d           | M0            | IIIB                        |
| T4b-c         | M0            | IIIB                        |
| T4d-e         | M0            | IIIC                        |
| Any T         | M1            | IV                          |

\*M0= no distant metastasis, M1= distant metastasis to liver, lung, or other sites  
 Adapted from the *AJCC Cancer Staging Manual, 8<sup>th</sup> edition*  
 Amin MB, Edge S, Greene F, Byrd DR, Brookland RK, Washington MK, Gershenwald JE, Compton CC, Hess KR, et al. (Eds.). *AJCC Cancer Staging Manual* (8th edition). Springer International Publishing: American Joint Commission on Cancer; 2017
